# Supplementary material for: Preparation of fluorescent probes based on covalent organic frameworks (COFs) and their application in the detection of nitro-containing pesticide residues
Source: Royal Society of Chemistry journal article supplement (doi:10.1039/d5ay01555c), 2025-01-01
Supplement: d5ay01555c1.pdf [file d5ay01555c1.pdf]

# **Preparation of Fluorescent Probes Based on Covalent Organic Frameworks (COFs) and Their Application in the Detection of Nitro-containing Pesticide Residues**

Yu Gan, Yingying Fu, Zhengchao Duan and Lianzhi Wang\*

School of Chemistry and Environmental Engineering, Hubei Minzu University, Enshi 445000, China.

## **Supplementary Information**

**Fig. S1.** PXRD patterns of COF<sub>ML-Tp</sub> and after treatment in pH=3.

**Fig. S2.** UV-vis absorption spectrum of ML, Tp and COF<sub>ML-Tp</sub>.

**Fig. S3.** Fluorescence emission spectrum of ML, T and COF<sub>ML-Tp</sub>.

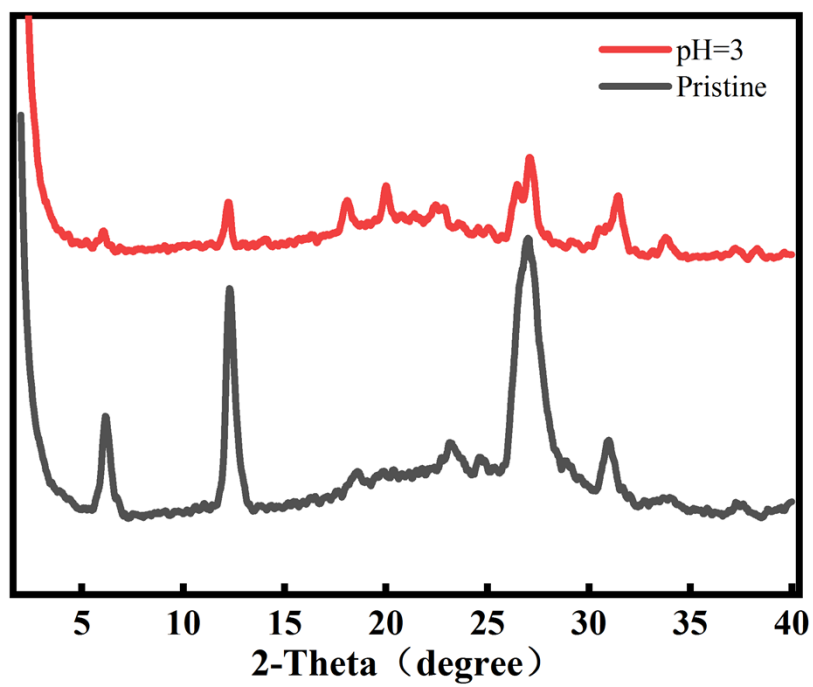

**Fig. S1.** PXRD patterns of COF<sub>ML-Tp</sub> and after treatment in pH=3.

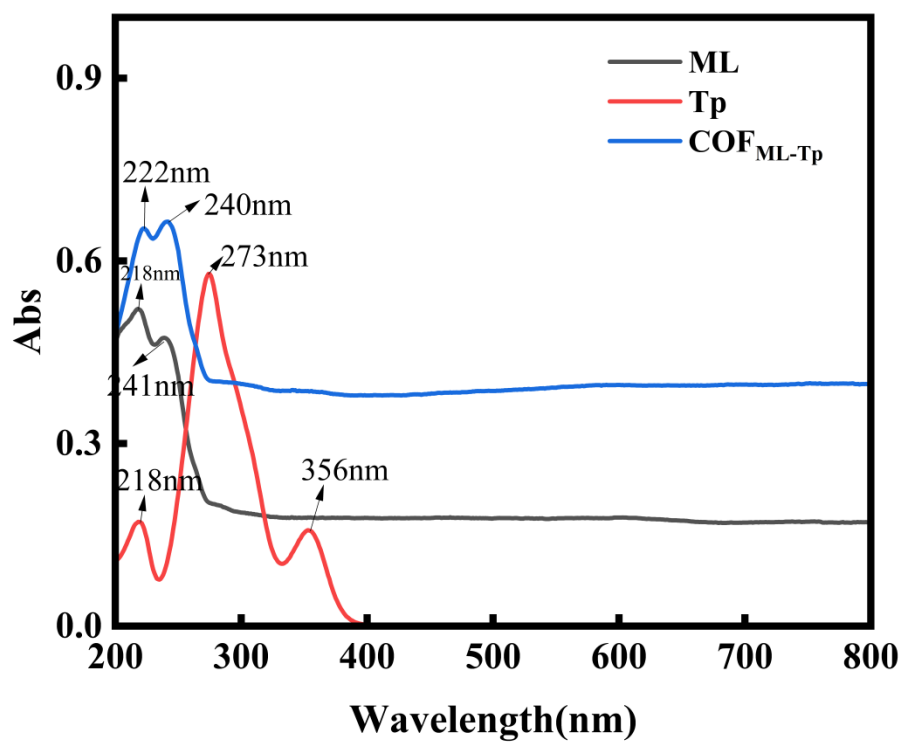

**Figure S2.** UV-vis absorption spectrum of ML, Tp and COFML-Tp.

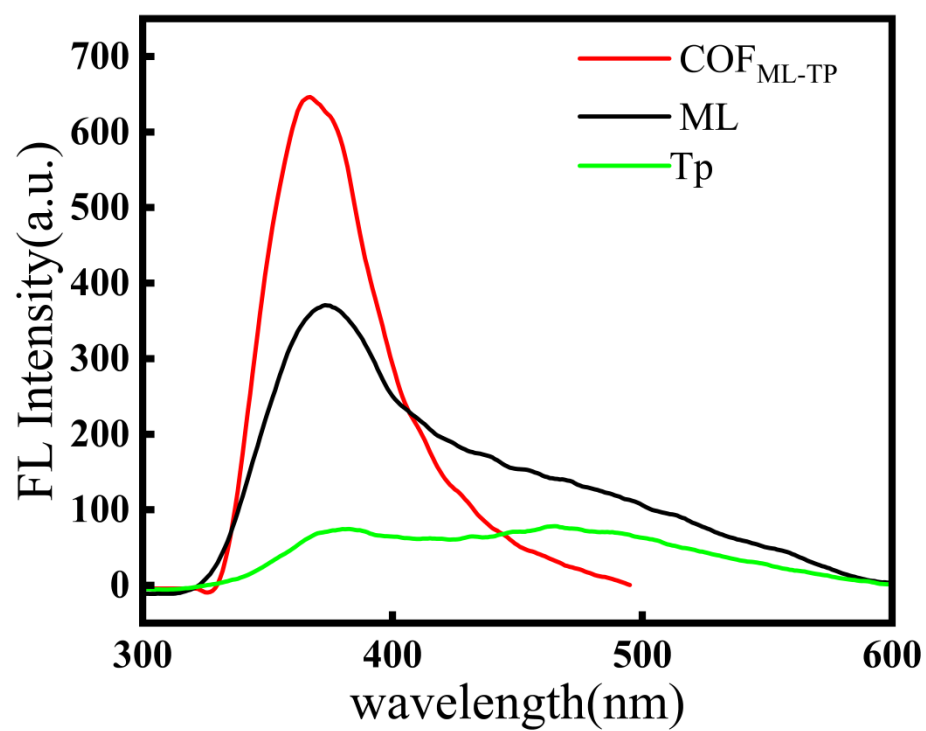

**Figure S3.** Fluorescence emission spectrum of ML, T and COF<sub>ML-TP</sub>.
